# Supplementary material for: Laboratory tests as short-term correlates of stroke
Source: PubMed Central journal article supplement (PMC4955202; doi:10.1186/s12883-016-0619-y), 2016-07-21
Supplement: 12883_2016_619_MOESM1_ESM.pdf [file 12883_2016_619_MOESM1_ESM.pdf]

| CATEGORY                                      | NUMBER  | PERCENTAGE |
|-----------------------------------------------|---------|------------|
| <b>HISPANIC/LATINO</b>                        | 682,670 | 28.30%     |
| <b>WHITE</b>                                  | 598,491 | 24.81%     |
| <b>NO INFORMATION</b>                         | 334,681 | 13.87%     |
| <b>WHITE - OTHER WHITE OR EUROPEAN</b>        | 182,863 | 7.58%      |
| <b>BLACK/AFRICAN AMERICAN</b>                 | 176,913 | 7.33%      |
| <b>ASIAN</b>                                  | 172,327 | 7.14%      |
| <b>DECLINE TO STATE</b>                       | 88,249  | 3.66%      |
| <b>NOT RECORDED</b>                           | 76,589  | 3.18%      |
| <b>WHITE - WESTERN EUROPE</b>                 | 29,112  | 1.21%      |
| <b>BLACK - OTHER BLACK</b>                    | 29,100  | 1.21%      |
| <b>UNKNOWN - PATIENT REFUSAL</b>              | 24,469  | 1.01%      |
| <b>NATIVE HAWAIIAN/OTHER PACIFIC ISLANDER</b> | 16,639  | 0.69%      |

Supplemental Table I. The racial/ethnic distribution of patients in the dataset.
